# Supplementary material
Source: publisher figshare collection journal article supplement (https://acs.figshare.com/ndownloader/files/5439767)
Supplement: Supplementary file 1 [file 5439767]

## **Supporting information to research article:**

### **Dietary epicatechin is available to breastfed infants through human breast milk in the form of host and microbial metabolites.**

Olha Khymenets<sup>1\*</sup>, Montserrat Rabassa<sup>1\*</sup>, María Rodríguez Palmero<sup>2</sup>,  
Montserrat Rivero-Urgell<sup>2</sup>, Mireia Urpi-Sarda<sup>1</sup>, Sara Tulipani<sup>1,3</sup>, Pilar Brandi<sup>4</sup>,  
Cristina Campoy<sup>4,5</sup>, Celestino Santos-Buelga<sup>6</sup>, Cristina Andres-Lacueva<sup>1</sup>.

<sup>1</sup>Nutrition and Food Science Department, Biomarkers and Nutrimetabolomics Lab., XaRTA, INSA, Faculty of Pharmacy and Food Sciences, University of Barcelona, Barcelona, Spain.

<sup>2</sup>Laboratorios Ordesa S.L., Parc Científic de Barcelona, Barcelona, Spain.

<sup>3</sup>Biomedical Research Institute (IBIMA), Service of Endocrinology and Nutrition, Hospital Complex Virgen de la Victoria, Malaga, Spain.

<sup>4</sup>Excellence Centre for Paediatric Research, Biomedical Research Centre, Health Sciences Technological Park, Hospital Universitario San Cecilio, Granada, Spain.

<sup>5</sup>Department of Paediatrics, School of Medicine, University of Granada, Granada, Spain

<sup>6</sup>GIP-USAL, Faculty of Pharmacy, University of Salamanca, Salamanca, Spain.

\*These authors contributed equally to the manuscript.

**Correspondence:** Dr. Cristina Andres-Lacueva, Tel: +34 934034840; Fax: +34 934035931; E-mail: candres@ub.edu

## **Eligibility criteria for study population:**

### **Inclusion criteria:**

- Healthy women, aged between 30 and 40 years.
- Pregnant women, with gestation over 30 weeks.
- Intention to breastfeed throughout the study period.
- The consumption of products with added probiotics (Actimel, bio yogurts, bio cheese, etc.) should not exceed more than 2 per week.

If the contact with the mother was made before childbirth, only those who met the following requirements were allowed to participate in the study:

- Childbirth term (> 36 weeks gestation), without major complications.
- Infants should be exclusively breastfed, i.e. receive only breast milk for feeding.
- Infants had to be healthy.

### **Exclusion criteria:**

- Mother's pathological background: neurological diseases, metabolic diseases, type I diabetes, chronic gastrointestinal diseases, ToRCH complex infections.
- Background disease during pregnancy: gestational diabetes, chronic disease (hypothyroidism), risk of abortion, hypertension, pre-eclampsia.

After childbirth, the following exclusion criteria were established:

- Antibiotic consumption during the study period.
- The consumption of bio products during the study period should not exceed more than 2 per week.
- Breastfeeding abandonment.
- The introduction of complementary feeding during the study.

**Table S1 (Supporting Information):** DCh flavan-3-ols<sup>a</sup> and epicatechin ingestion by both volunteers, participating in the preliminary experiment on epicatechin BM bioavailability, calculated on the base of their 24 hr DRs

|                                                    | Total dietary flavan-3-ols (mg/day) <sup>a</sup> | DCh intervention (g (% cocoa)) | DCh flavan-3-ols                         |                                              |                 |                           |
|----------------------------------------------------|--------------------------------------------------|--------------------------------|------------------------------------------|----------------------------------------------|-----------------|---------------------------|
|                                                    |                                                  |                                | Total flavan-3-ols (mg/day) <sup>a</sup> | % of total dietary flavan-3-ols <sup>a</sup> | EpiCat (mg/day) | % of total dietary EpiCat |
| Volunteer 1                                        |                                                  |                                |                                          |                                              |                 |                           |
| DCh intervention within habitual diet <sup>b</sup> | 87.19                                            | 40 (85%)                       | 80.08                                    | 91.84                                        | 38.59           | 91.84                     |
| Volunteer 2                                        |                                                  |                                |                                          |                                              |                 |                           |
| DCh intervention within habitual diet <sup>c</sup> | 102.38                                           | 50 (75%)                       | 80.08                                    | 78.22                                        | 38.59           | 96.86                     |

DCh – dark chocolate; 24 hr DR – 24 h dietary records; EpiCat – epicatechin; Vol – volunteer.

<sup>a</sup>- flavan-3-ols refer only to monomers and are expressed as aglycone equivalents (mg/d) and were calculated as the sum of catechin, catechin-3-gallate, epicatechin, epicatechin-3-gallate, epigallocatechin, epigallocatechin-3-gallate and galocatechin.

<sup>b</sup> - Volunteer 1 on the morning of the day before the intervention had consumed the same type and amount of DCh as for the intervention as a part of her habitual diet. In this case, the evaluation of the day before's habitual consumption (24 h DR) included the DCh intervention.

<sup>c</sup>- estimated by adding DCh intervention to the habitual diet evaluated the day before using 24 hr DR.

**Table S2 (Supporting Information):** Mass spectrometric and chromatographic characteristics of epicatechin metabolites along with the reference compound used for UPLC-MS/MS<sup>a</sup> determination (isomer numeration is according to earlier published methodology<sup>1, 2</sup>)

| Compound                           | Q1  | Q3  | CE (V) | RT (min)            |
|------------------------------------|-----|-----|--------|---------------------|
| <b>Flavan-3-ol monomers</b>        |     |     |        |                     |
| EpiCat-Gluc-1&2, -3 and -4         | 465 | 289 | -25    | 0.48; 0.64 and 0.82 |
| Cat and EpiCat                     | 289 | 245 | -25    | 0.75 and 0.91       |
| EpiCat-Sulf-1 and -2               | 369 | 289 | -25    | 0.72 and 0.87       |
| Met-EpiCat-Gluc-1, -2 and -3       | 479 | 303 | -30    | 0.6; 0.69 and 0.84  |
| Met-EpiCat-Sulf-1, -2 and -3       | 383 | 303 | -25    | 0.89; 0.97 and 1.08 |
| 3'- and 4'-Met-EpiCat              | 303 | 137 | -25    | 1.13 and 1.23       |
| <b>Hydroxyphenylvalerolactones</b> |     |     |        |                     |
| DHPV-Gluc-1 and -2                 | 383 | 207 | -25    | 0.83 and 0.9        |
| DHPV-Sulf-1 and -2                 | 287 | 207 | -25    | 0.71 and 0.92       |
| MHPV-Gluc-1                        | 397 | 221 | -25    | 0.93                |
| MHPV-Sulf-1 and -2                 | 301 | 221 | -25    | 0.99 and 1.08       |
| <b>References</b>                  |     |     |        |                     |
| Ethyl gallate (I.S.)               | 197 | 169 | -25    | 1.16                |

Cat – catechin; CE – collision energy; DHPV - 5-(3',4'-dihydroxyphenyl)-γ-valerolactone; EpiCat – epicatechin; Gluc – glucuronidate; I.S. – internal standard; Met-EpiCat – methyl-O-epicatechin; MHPV - 5-(3'-methoxy,4'-hydroxyphenyl)-γ-valerolactone; Q – quadrupole; Sulf – sulphate; <sup>a</sup> - analysis performed in negative ionization mode.

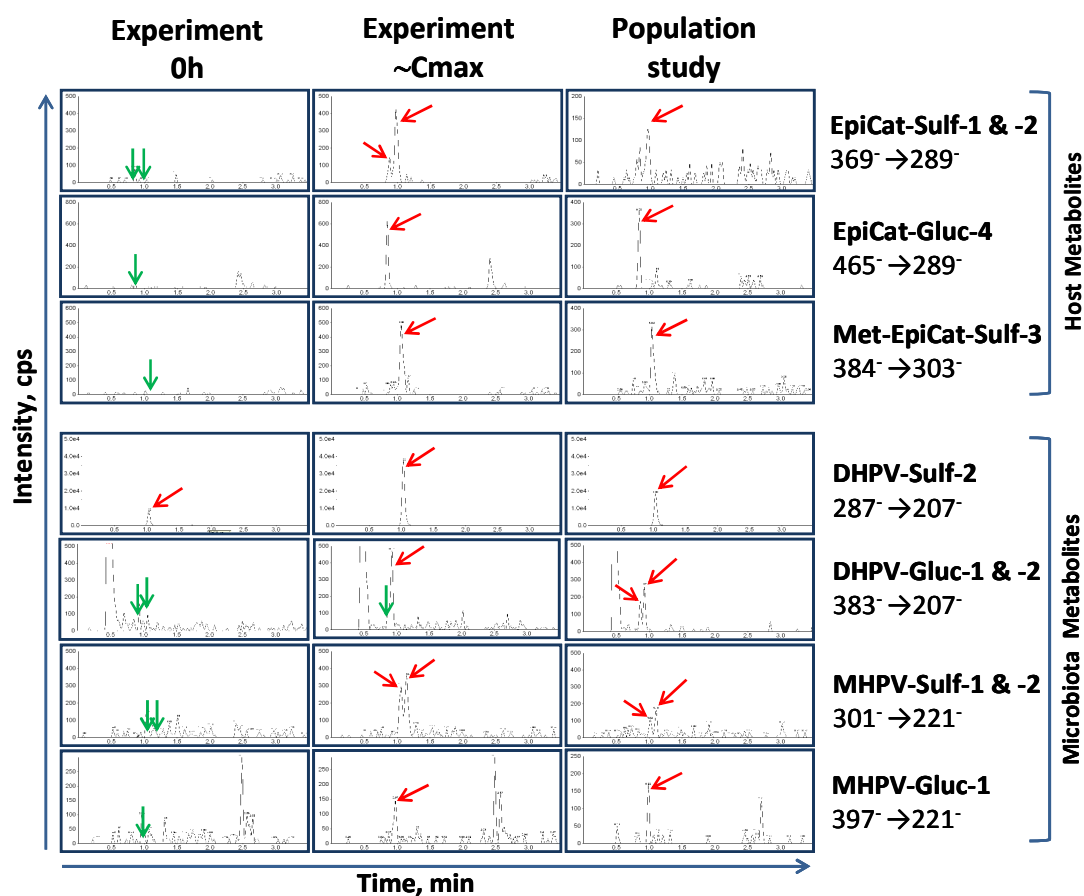

**Figure S1 (Supporting Information):** Selected chromatograms of identified epicatechin metabolites in pre- and post-intervention (close to maximum concentration (Cmax) of each compound) samples from bioavailability experiment and identified compounds in selected samples from population study. Red arrow marks point to detected compounds; green arrow marks point to the time where the compound peak is expected to elute.

**Table S3 (Supporting Information):** Brief summary of excretion kinetics for epicatechin metabolites detected in BM after acute DCh intake by lactating mothers

| Detected metabolites   | $C_{\max}$ ,<br>nmol/L |                | $T_{\max}$ ,<br>h | Cumulative<br>excretion (12<br>h)*, nmol | % of<br>consumed<br>EpiCat** |
|------------------------|------------------------|----------------|-------------------|------------------------------------------|------------------------------|
|                        | Volunteer<br>1         | Volunteer<br>2 |                   |                                          |                              |
| EpiCat-Sulf-1          | ND                     | 15.70          | 6                 | 1.256                                    | 0.0009                       |
| EpiCat-Sulf-2          | 20.84                  | 25.51          | 4-5               | 1.588                                    | 0.0012                       |
| EpiCat-Gluc-4          | 38.45                  | 37.08          | 4-5               | 1.771                                    | 0.0013                       |
| Met-EpiCat-Sulf-3      | 25.42                  | 26.07          | 5-8               | 1.720                                    | 0.0013                       |
| Total host metabolites |                        |                |                   | 6,335                                    | 0,0048                       |
| DHPV-Sulf-1            | 19.44                  | ND             | NA                | NA                                       | NA                           |
| DHPV-Sulf-2            | 2097.29                | 254.20         | NA                | NA                                       | NA                           |
| DHPV-Gluc-2            | 59.66                  | ND             | NA                | NA                                       | NA                           |
| MHPV-Sulf-1            | 25.03                  | ND             | NA                | NA                                       | NA                           |
| MHPV-Sulf-2            | 29.47                  | ND             | NA                | NA                                       | NA                           |
| MHPV-Gluc-1            | 17.75                  | ND             | NA                | NA                                       | NA                           |

BM – breast milk;  $C_{\max}$  – maximum concentration; DCh – dark chocolate; DHPV – 5-(3',4'-dihydroxyphenyl)- $\gamma$ -valerolactone; EpiCat – epicatechin; Gluc – glucuronidate; Met-EpiCat – methyl-epicatechin; MHPV – 5-(3'-methoxy,4'--hydroxyphenyl)- $\gamma$ -valerolactone; NA – not available; ND – not detected; Sulf – sulphate;  $T_{\max}$  – time when maximum concentration was reached. <sup>a</sup> – calculated for Volunteer 2, one breast only on the basis of the detected epicatechin metabolites; <sup>b</sup> – calculated for Volunteer 2 for one breast only and according to EpiCat consumed with DCh.

**Table S4 (Supporting Information):** Cocoa-derived and total flavan-3-ol (monomer) consumption by free-living lactating mothers according to collected 24 hr DRs and epicatechin metabolites detected in corresponding BM samples

| Vol_ID | sample ID | BM type | cocoa-derived flavan-3-ols (mg/d) |                           | total dietary flavan-3-ols (mg/d) |                           | host EpiCat metabolites detected in BM (nmol/L) |               |                  | microbiota-derived EpiCat metabolites detected in BM (nmol/L) |             |             |             |             |             |
|--------|-----------|---------|-----------------------------------|---------------------------|-----------------------------------|---------------------------|-------------------------------------------------|---------------|------------------|---------------------------------------------------------------|-------------|-------------|-------------|-------------|-------------|
|        |           |         | EpiCat                            | Flavan-3-ols <sup>a</sup> | EpiCat                            | Flavan-3-ols <sup>a</sup> | EpiCat-Gluc-4                                   | EpiCat-Sulf-2 | MetEpiCat-Sulf-3 | DHPV-Gluc-1                                                   | DHPV-Gluc-2 | DHPV-Sulf-2 | MHPV-Gluc-1 | MHPV-Sulf-1 | MHPV-Sulf-2 |
| 1      | O_02      | Tr      | 0.31                              | 0.51                      | 1.23                              | 2.35                      | n.d.                                            | n.d.          | n.d.             | n.d.                                                          | n.d.        | 57.07       | n.d.        | n.d.        | n.d.        |
|        | O_03      | M       | 0.00                              | 0.00                      | 0.93                              | 7.35                      | n.d.                                            | n.d.          | n.d.             | n.d.                                                          | n.d.        | n.d.        | n.d.        | n.d.        | n.d.        |
| 2      | O_04      | C       | 3.12                              | 9.22                      | 3.14                              | 15.34                     | n.d.                                            | n.d.          | n.d.             | n.d.                                                          | n.d.        | 510.88      | n.d.        | n.d.        | n.d.        |
|        | O_05      | Tr      | 3.12                              | 9.22                      | 3.12                              | 9.22                      | n.d.                                            | n.d.          | n.d.             | n.d.                                                          | n.d.        | 175.24      | n.d.        | 14.94       | n.d.        |
|        | O_06      | M       | 3.12                              | 9.22                      | 3.15                              | 15.63                     | n.d.                                            | 13.53         | n.d.             | n.d.                                                          | 19.04       | 415.46      | n.d.        | 19.63       | n.d.        |
| 3      | O_07      | Tr      | 0.00                              | 0.00                      | 6.94                              | 9.54                      | n.d.                                            | n.d.          | 13.23            | n.d.                                                          | n.d.        | 34.24       | n.d.        | n.d.        | n.d.        |
|        | O_08      | M       | 5.62                              | 16.60                     | 6.57                              | 18.48                     | n.d.                                            | n.d.          | n.d.             | n.d.                                                          | n.d.        | 58.39       | n.d.        | n.d.        | n.d.        |
|        | O_09      | M       | 5.62                              | 16.60                     | 6.00                              | 17.63                     | n.d.                                            | n.d.          | n.d.             | n.d.                                                          | n.d.        | 86.95       | n.d.        | n.d.        | 16.89       |
| 4      | O_12      | Tr      | 6.28                              | 12.18                     | 29.67                             | 45.36                     | n.d.                                            | n.d.          | n.d.             | n.d.                                                          | n.d.        | 713.35      | n.d.        | 18.68       | 20.10       |
|        | O_13      | M       | 3.13                              | 9.38                      | 10.27                             | 22.33                     | n.d.                                            | n.d.          | n.d.             | n.d.                                                          | n.d.        | 320.94      | n.d.        | n.d.        | 17.25       |
| 5      | O_15      | Tr      | 6.04                              | 13.07                     | 7.91                              | 17.12                     | n.d.                                            | 13.43         | 17.19            | n.d.                                                          | n.d.        | 216.17      | n.d.        | n.d.        | n.d.        |
|        | O_16      | M       | 3.12                              | 9.22                      | 3.15                              | 9.31                      | n.d.                                            | 14.49         | 15.62            | n.d.                                                          | n.d.        | 204.68      | n.d.        | 16.50       | 17.26       |
| 6      | O_18      | Tr      | 5.83                              | 7.69                      | 6.51                              | 20.13                     | 36.37                                           | n.d.          | n.d.             | n.d.                                                          | 39.16       | 1909.84     | n.d.        | 26.26       | n.d.        |
| 7      | O_20      | Tr      | 11.24                             | 33.20                     | 11.26                             | 33.23                     | 32.64                                           | n.d.          | 23.74            | n.d.                                                          | n.d.        | 83.05       | n.d.        | n.d.        | n.d.        |
|        | O_21      | Tr      | 11.24                             | 33.20                     | 19.71                             | 47.52                     | n.d.                                            | n.d.          | n.d.             | n.d.                                                          | n.d.        | 109.41      | n.d.        | n.d.        | n.d.        |
|        | O_22      | M       | 0.00                              | 0.00                      | 7.92                              | 11.44                     | n.d.                                            | n.d.          | n.d.             | n.d.                                                          | n.d.        | 19.53       | n.d.        | n.d.        | n.d.        |
| 8      | O_23      | C       | 7.86                              | 10.28                     | 14.94                             | 19.40                     | 15.39                                           | n.d.          | 15.79            | n.d.                                                          | n.d.        | 164.53      | n.d.        | n.d.        | n.d.        |
|        | O_24      | Tr      | 1.46                              | 1.92                      | 16.82                             | 29.32                     | n.d.                                            | n.d.          | n.d.             | n.d.                                                          | n.d.        | 23.78       | n.d.        | n.d.        | n.d.        |
|        | O_25      | M       | 2.84                              | 8.50                      | 4.43                              | 24.47                     | n.d.                                            | n.d.          | n.d.             | n.d.                                                          | n.d.        | n.d.        | n.d.        | n.d.        | n.d.        |
| 9      | O_26      | Tr      | 2.92                              | 3.84                      | 3.86                              | 5.71                      | n.d.                                            | ND            | n.d.             | n.d.                                                          | 22.38       | 340.71      | 0.00        | n.d.        | n.d.        |
|        | O_27      | M       | 0.00                              | 0.00                      | 14.24                             | 18.93                     | n.d.                                            | ND            | n.d.             | 25.58                                                         | 39.25       | 434.82      | 24.28       | n.d.        | n.d.        |
| 10     | O_28      | C       | 0.00                              | 0.00                      | 7.51                              | 10.92                     | 25.51                                           | n.d.          | 23.67            | n.d.                                                          | 36.58       | 780.94      | n.d.        | n.d.        | 20.20       |
|        | O_29      | Tr      | 5.83                              | 7.69                      | 20.53                             | 26.47                     | n.d.                                            | n.d.          | n.d.             | n.d.                                                          | n.d.        | 54.06       | n.d.        | n.d.        | n.d.        |
|        | O_30      | M       | 0.00                              | 0.00                      | 0.92                              | 1.84                      | n.d.                                            | n.d.          | 13.91            | n.d.                                                          | n.d.        | 80.82       | n.d.        | n.d.        | n.d.        |

BM – breast milk; C – colostrum milk; DHPV – 5-(3',4'-dihydroxyphenyl)-γ-valerolactone; EpiCat – epicatechin; Gluc – glucuronidate; M – mature milk; Met-EpiCat – methyl-epicatechin; MHPV – 5-(3'-methoxy,4'--hydroxyphenyl)-γ-valerolactone; n.d.– not detected; Sulf – sulphate; Tr – transition milk.

<sup>a</sup> – Total and cocoa flavan-3-ol monomers were expressed as aglycone equivalents (mg/d) and were calculated as the sum of catechin, catechin-3-gallate, epicatechin, epicatechin-3-gallate, epigallocatechin, epigallocatechin-3-gallate and gallocatechin. Cells marked in light grey correspond to no-cocoa consumption data and those marked in dark grey indicate epicatechin metabolites detected in BM.

**Table S5 (Supporting Information):** Dietary intake of flavan-3-ols (monomers) and epicatechin in total and specifically of cocoa origin by breastfeeding mothers in the population study based on FFQ and 24 h DR (data are presented as mean (SD) or in % as stated in the table)

| dietary records                                | dietary polyphenols                     |                                            |                               |                                                          | dietary flavanols                  |                 | cocoa-derived flavanols            |                 |
|------------------------------------------------|-----------------------------------------|--------------------------------------------|-------------------------------|----------------------------------------------------------|------------------------------------|-----------------|------------------------------------|-----------------|
|                                                | total polyphenols (mg/day) <sup>b</sup> | cocoa polyphenols by food (%) <sup>c</sup> | flavan-3-ols (%) <sup>c</sup> | cocoa flavan-3-ols by food (%) <sup>c</sup>              | flavan-3-ols (mg/day) <sup>d</sup> | EpiCat (mg/day) | flavan-3-ols (mg/day) <sup>d</sup> | EpiCat (mg/day) |
| FFQ (n=9)                                      | 1104.97 (465.97)                        | 5% cocoa, 3% DCh                           | 4.40                          | 23% DCh.<br>14% cocoa.<br>7% chocolate products          | 48.59 (36.31)                      | 19.39 (12.19)   | 18.59 (19.66)                      | 8.25 (8.42)     |
| 24 hr DR colostrum (n=8)                       | 874.98 (578.02)                         | 3% chocolate products, 2% cocoa            | 8.57                          | 10% chocolate products.<br>3% cocoa                      | 74.99 (175.20)                     | 11.88 (17.46)   | 10.05 (15.85)                      | 5.06 (8.02)     |
| 24 hr DR transition (n=11 or 12 <sup>a</sup> ) | 594.39 (251.86)                         | 10% cocoa, 3% MCh, 1% DCh                  | 3.22                          | 37% cocoa.<br>9% MCh.<br>6% chocolate products<br>3% DCh | 19.16 (15.45)                      | 7.94 (8.57)     | 8.35 (9.30)                        | 3.56 (3.33)     |
| 24 hr DR mature (n=11 or 12 <sup>a</sup> )     | 785.36 (498.41)                         | 5% cocoa, 2% MCh, 1% DCh                   | 1.98                          | 28 % cocoa.<br>11% MCh.<br>5% DCh                        | 15.57 (8.61)                       | 8.35 (6.13)     | 5.87 (5.85)                        | 2.74 (2.51)     |

DCh – dark chocolate; EpiCat – epicatechin; FFQ – frequency food questionnaire; MCh – milk chocolate; 24 hr DR – 24-hour dietary records. <sup>a</sup> – some data/samples were collected twice from the same volunteer at different time points; <sup>b</sup> – dietary total polyphenols intake was calculated as the sum of flavonoids (anthocyanidins, flavonols, flavanones, flavones, flavanols [including flavan-3-ol monomers, theaflavins and proanthocyanidins] and isoflavones), phenolic acids, lignans, stilbenes and other polyphenols and was expressed as aglycone equivalents (mg/day); <sup>c</sup> – % of total dietary polyphenol; <sup>d</sup> – total dietary and cocoa flavan-3-ol monomers were expressed as aglycone equivalents (mg/day) and were calculated as the sum of catechin, catechin-3-gallate, epicatechin, epicatechin-3-gallate, epigallocatechin, epigallocatechin-3-gallate and gallic catechin.



**References:**

1. Urpi-Sarda, M.; Monagas, M.; Khan, N.; Llorach, R.; Lamuela-Raventos, R. M.; Jauregui, O.; Estruch, R.; Izquierdo-Pulido, M.; Andres-Lacueva, C., Targeted metabolic profiling of phenolics in urine and plasma after regular consumption of cocoa by liquid chromatography-tandem mass spectrometry. *Journal of Chromatography. A* **2009**, *1216*, 7258-67.
2. Boto-Ordóñez, M.; Urpi-Sarda, M.; Queipo-Ortuno, M. I.; Corella, D.; Tinahones, F. J.; Estruch, R.; Andres-Lacueva, C., Microbial metabolomic fingerprinting in urine after regular dealcoholized red wine consumption in humans. *J Agric Food Chem* **2013**, *61*, 9166-75.
